# Supplementary material for: Microgravity Exposure Induces Antioxidant Barrier Deregulation and Mitochondria Alterations in TCam-2 Cell Spheroids
Source: Preprints.org preprint supplement (doi:10.20944/preprints202307.1248.v1), 2023-07-18

## **Microgravity exposure induces antioxidant barrier deregulation and mitochondria alterations in TCam2 cell spheroids**

M. Berardini et al

### **Supplementary material of Western blots:**

In this section, the replicates of all immunoblots for each protein analyzed are reported. Where indicated, the same membrane was probed with different antibodies or stripped and re-probed with other antibodies. Representative blots shown in the paper are indicated with a red box.

A

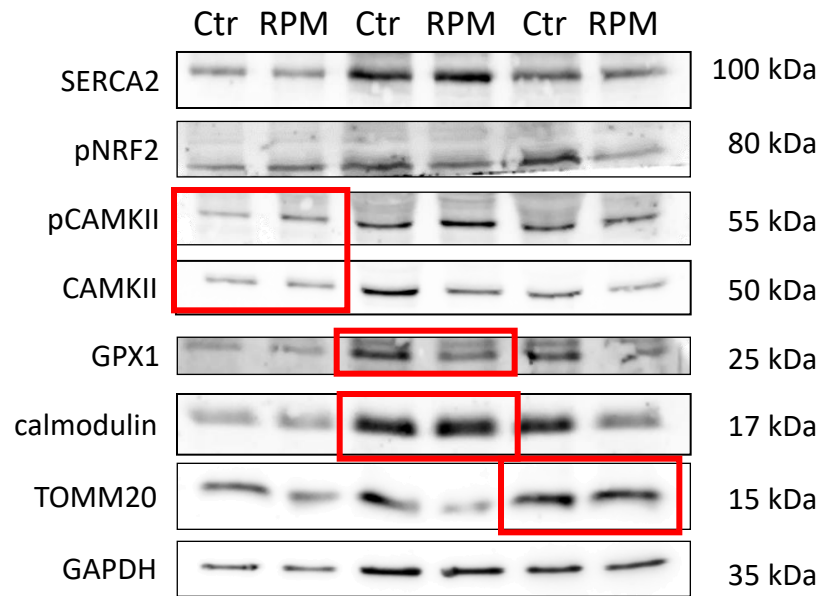

## Merge of membrane A with markers

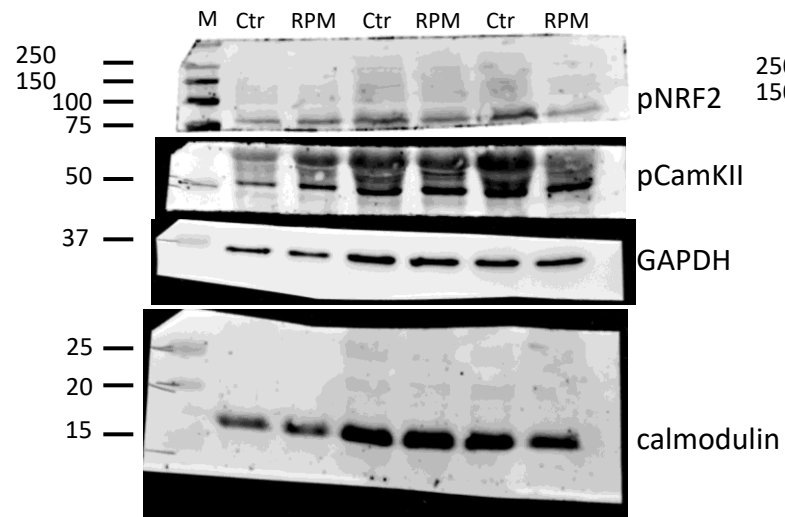

## After stripping

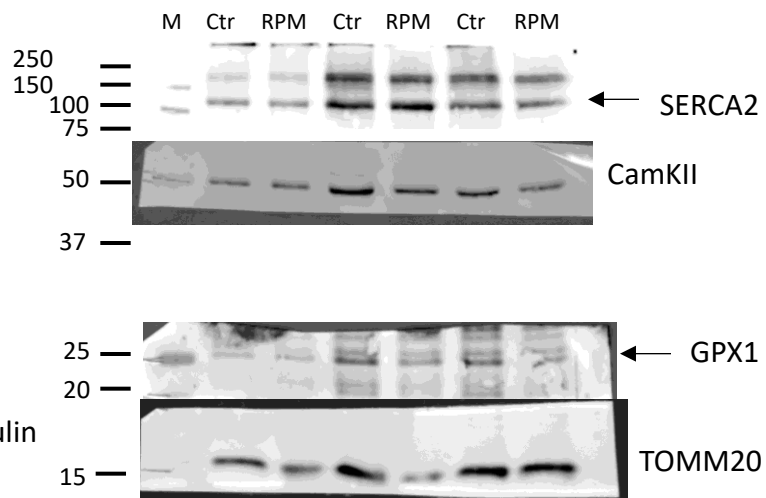

B

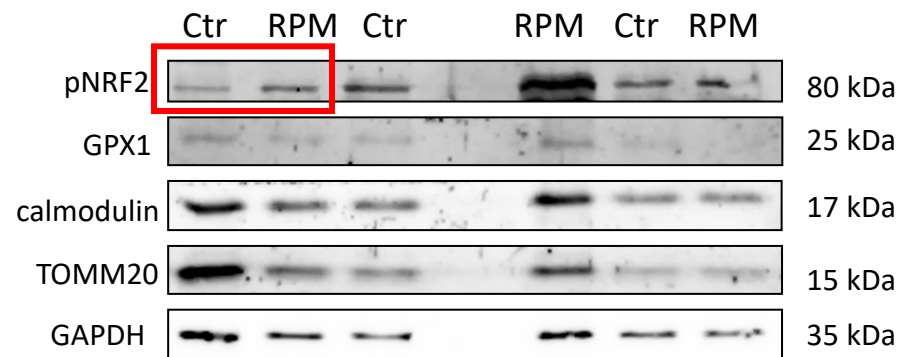

### Merge of membrane B with markers

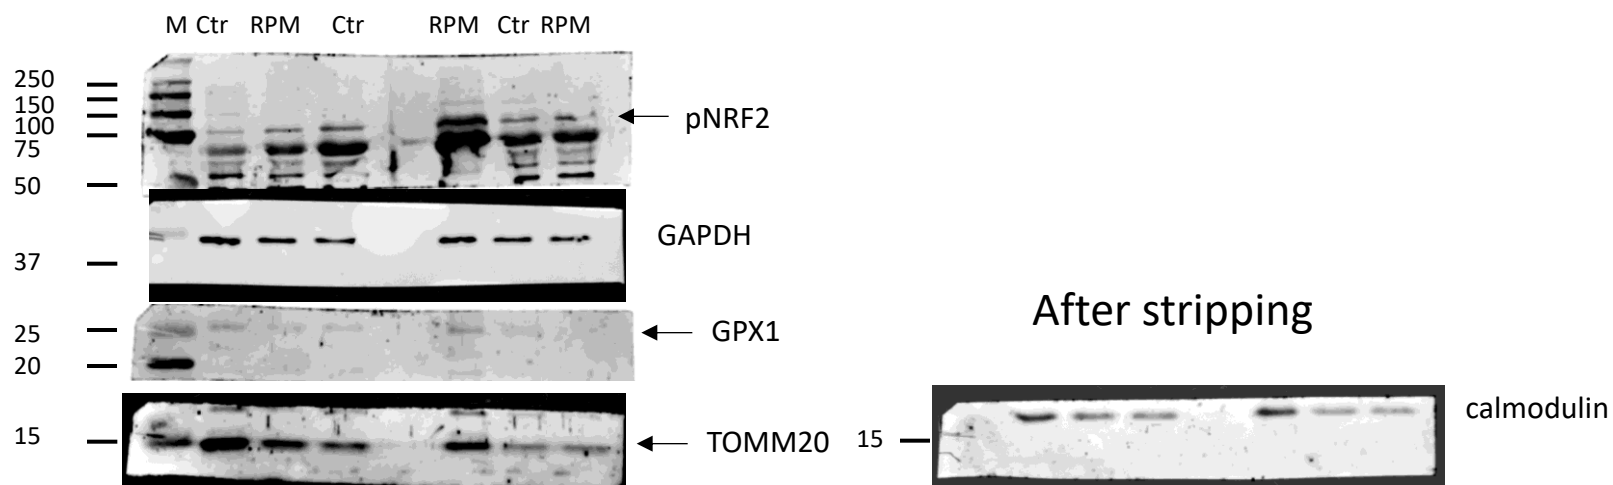

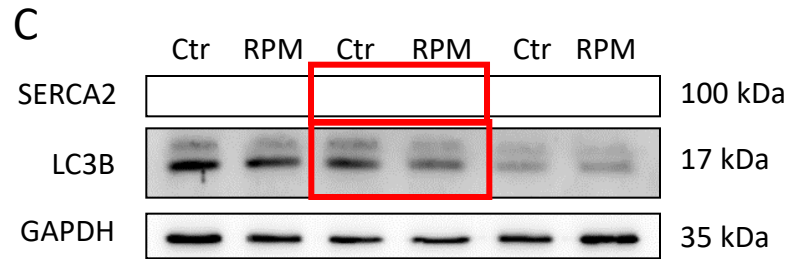

Merge of membrane C with markers

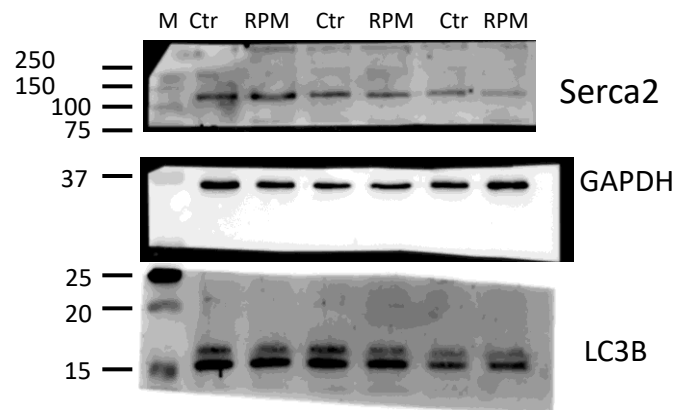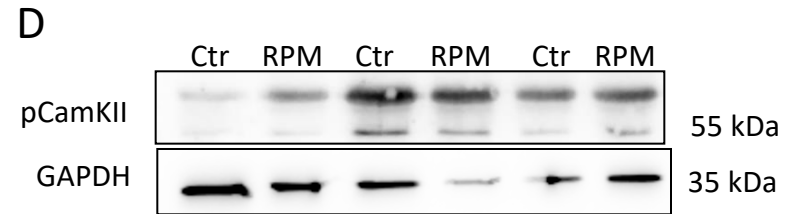

Merge of membrane D with markers

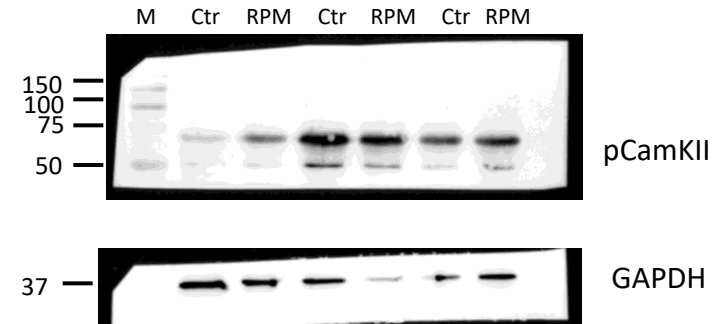

E

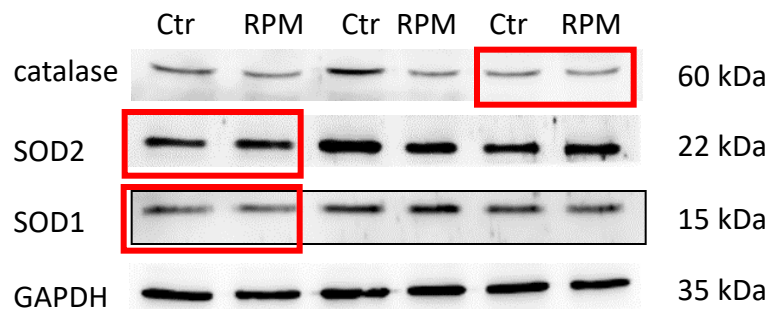

Merge of membrane E with markers

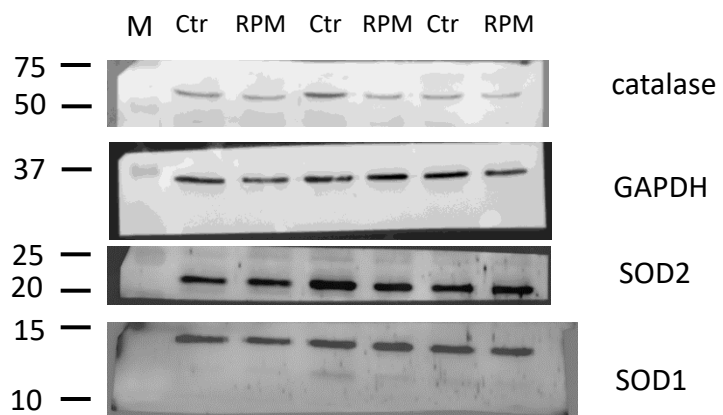

F

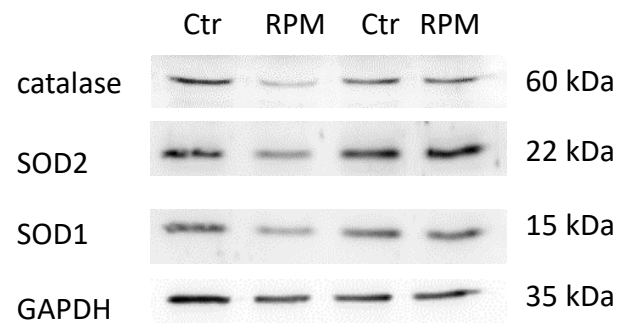

Merge of membrane F with markers

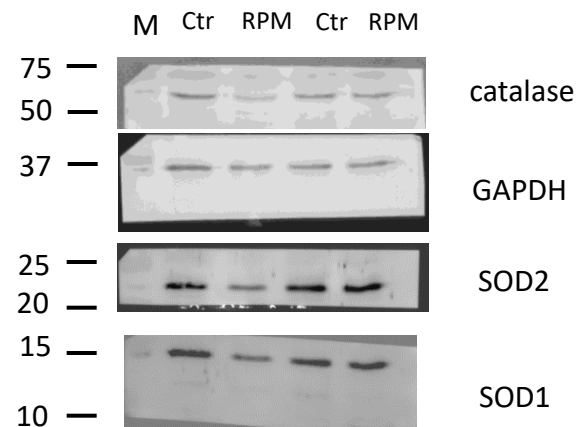

G

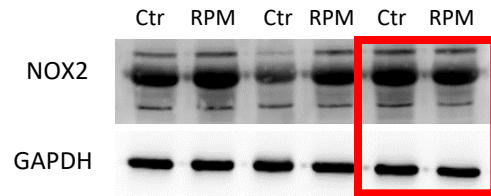

Merge of membrane G with markers

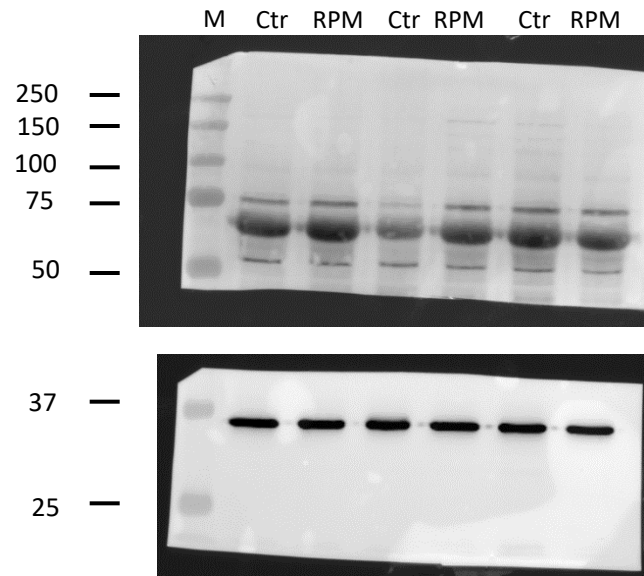

H

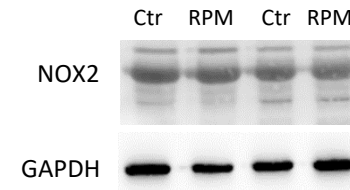

Merge of membrane H with markers

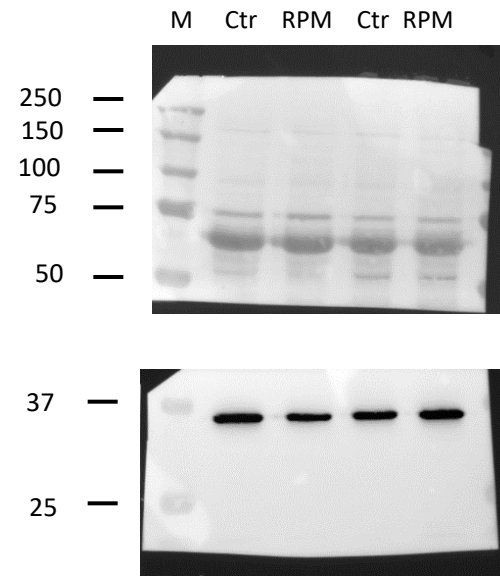

Western blot analysis of NOX4 and GAPDH protein levels in H9c2 cells. The blot shows NOX4 (67 kDa) and GAPDH (35 kDa) bands. Lanes are labeled Ctr, RPM, Ctr, RPM, Ctr, RPM. The NOX4 bands in the RPM lanes are significantly more intense than in the Ctr lanes, and are highlighted with a red box. GAPDH bands are consistent across all lanes, serving as a loading control.

L

## 3- Nitrotyrosine

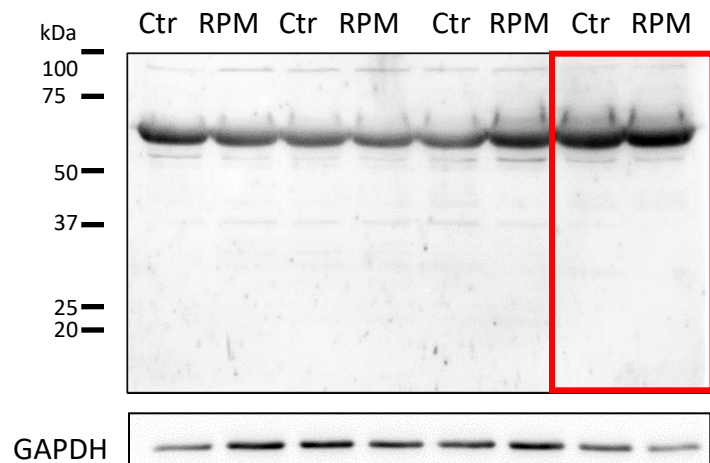

Merge of membrane L with markers

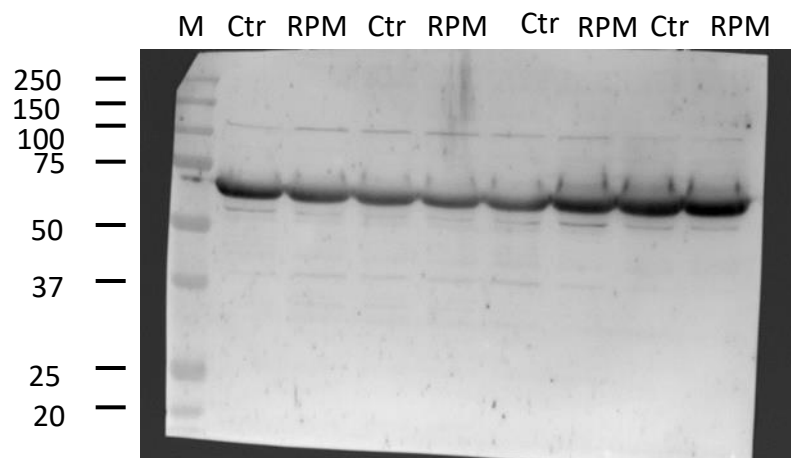

After Stripping

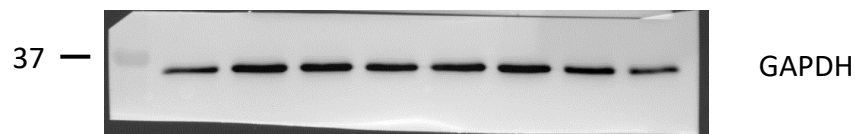

M

## 3- Nitrotyrosine

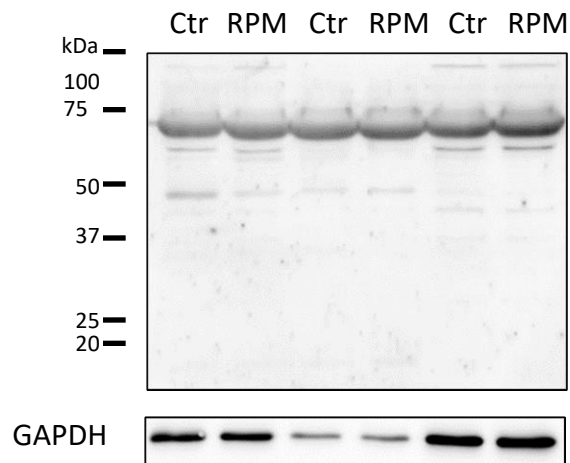

Merge of membrane M with markers

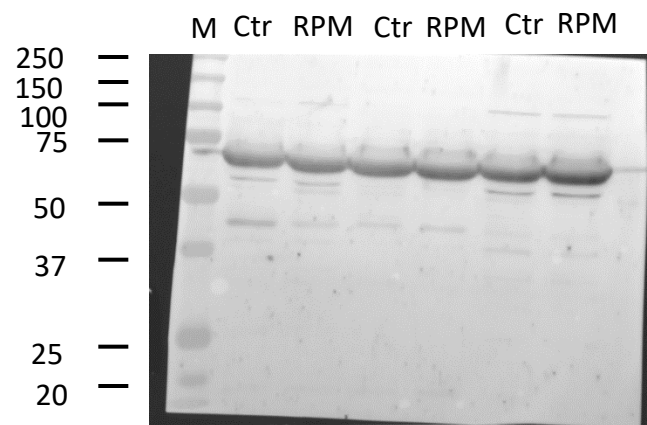

After Stripping

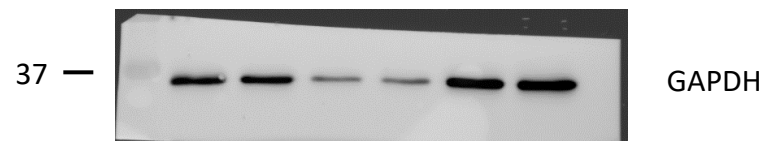



## N 4- Hydroxynonenal

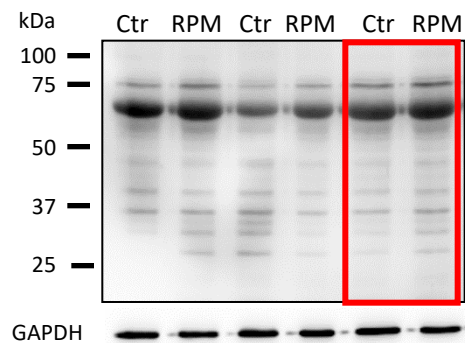

## Merge of membrane N with markers

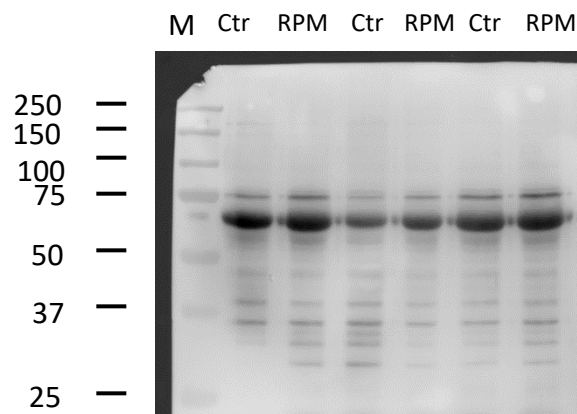

## After Stripping

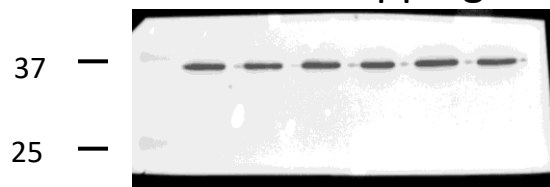

## O 4- Hydroxynonenal

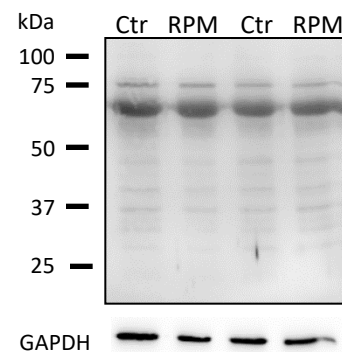

## Merge of membrane O with markers

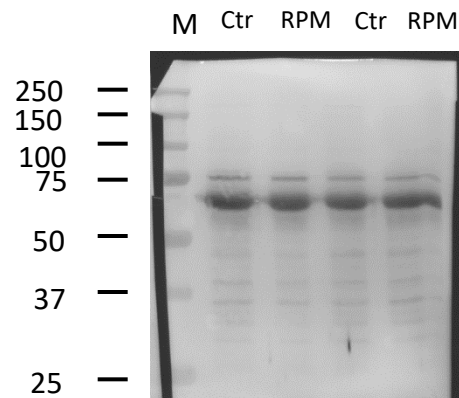

## After Stripping

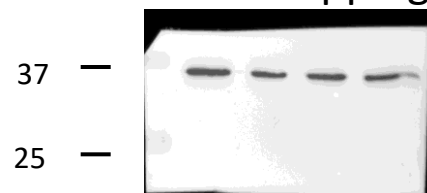

Supplement: Supplementary file 1 [file supplementary]
