# Supplementary material for: Microgravity Exposure Induces Antioxidant Barrier Deregulation and Mitochondria Alterations in TCam-2 Cell Spheroids
Source: Preprints.org preprint supplement (doi:10.20944/preprints202307.1248.v1), 2023-07-18
Supplement: Supplementary file 2 [file supplementary]

| Target gene | Forward primer              | Reverse primer                  |
|-------------|-----------------------------|---------------------------------|
| SOD1        | 5'-TGTGGGGAAGCATTAAAGGA-3'  | 5'-TGGATAGAGGATTAAAGTGAGGACC-3' |
| CAT         | 5'-CCACCTGAAGGATGCACAA-3'   | 5'-AGTCAGGGTGGACCTCAGTG-3'      |
| GPX1        | 5'-CCGGGACTACACCCAGATGA-3'  | 5'-TCTTGGCGTTCTCCTGATGC-3'      |
| HMOX1       | 5'-AACTTTCAGAAGGGCCAGGT-3'  | 5'- CTTGTTGCGCTCAATCTCCT-3'     |
| XDH         | 5'-GGGGAACACCCAGGATCTC-3'   | 5'-GGAAGGTTGGTTTTGCACAG-3'      |
| CYBA        | 5'-CCAGTGGTACTTTGGTGCCTA-3' | 5'-GAGCCCTTCTTCCTCTTCCC-3'      |
| CYBB        | 5'-CTGTCCTTCCTCAGGGGTTC-3'  | 5'-ATCATCCATGCCACCATTTT-3'      |
| NCF1        | 5'-TCGACTTCTTCAAGGTGCG-3'   | 5'-TACTCTTGCCATCTTTGGGC-3'      |
| NCF2        | 5'-GGGGCCAGGTGAAAACTAC-3'   | 5'-TCATCTGGAAAGCCTTGGTC-3'      |
| GUSB        | 5'-CGGTCGTGATGTGGTCTGT-3'   | 5'-GGTCCAAGGATTTGGTGTGA-3'      |

Table1
